# Supplementary material for: A novel photosensitizer based on hypocrellin B activated by cysteine over-expressed in cancer cells
Source: Royal Society of Chemistry journal article supplement (doi:10.1039/d4ob01288g), 2024-01-01
Supplement: d4ob01288g1.pdf [file d4ob01288g1.pdf]

**Supplementary information**

**A novel photosensitizer based on hypocrellin B activated by cysteine  
over-expressed in cancer cells**

Fumihisa Ishida, Rikuto Onishi, Daisuke Takahashi and Kazunobu Toshima\*

| <b>Page</b> | <b>Contents</b>                                                              |
|-------------|------------------------------------------------------------------------------|
| S2          | • • • <sup>1</sup> H NMR, <sup>13</sup> C NMR, HMBC and HRMS spectrum charts |

**$^1\text{H}$  NMR,  $^{13}\text{C}$  NMR, HMBC and HRMS  
spectrum charts**

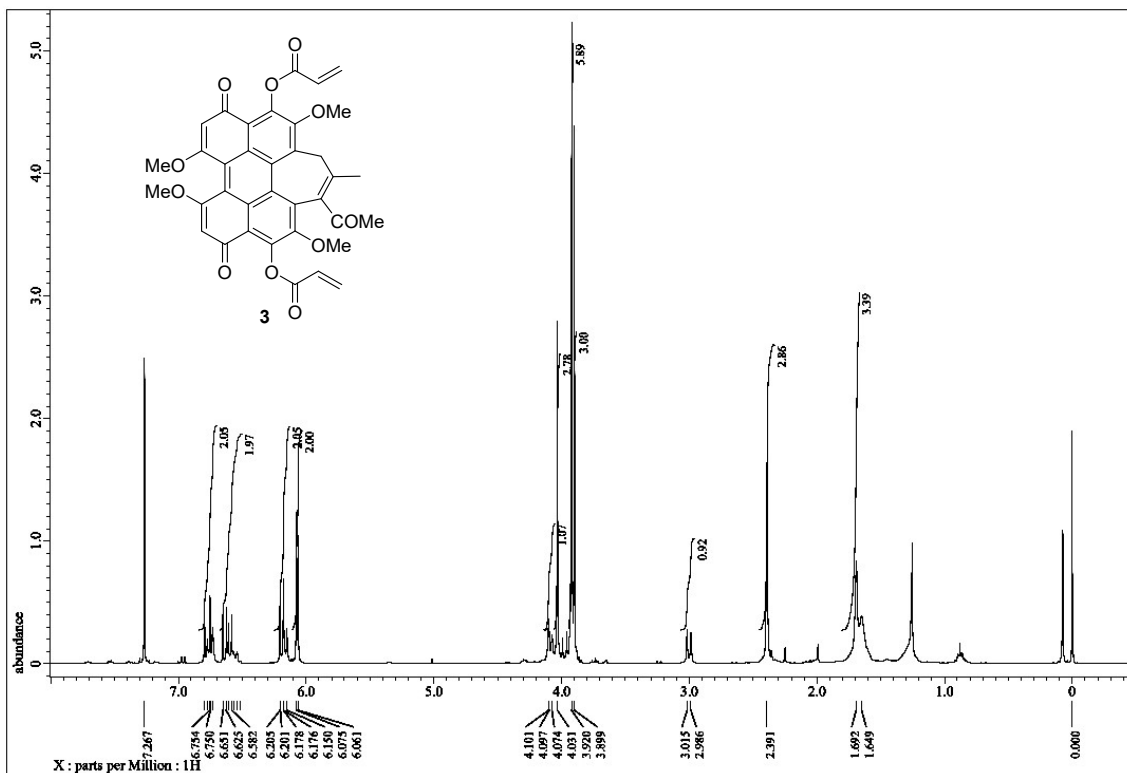

Fig. S1 <sup>1</sup>H NMR spectrum of 3

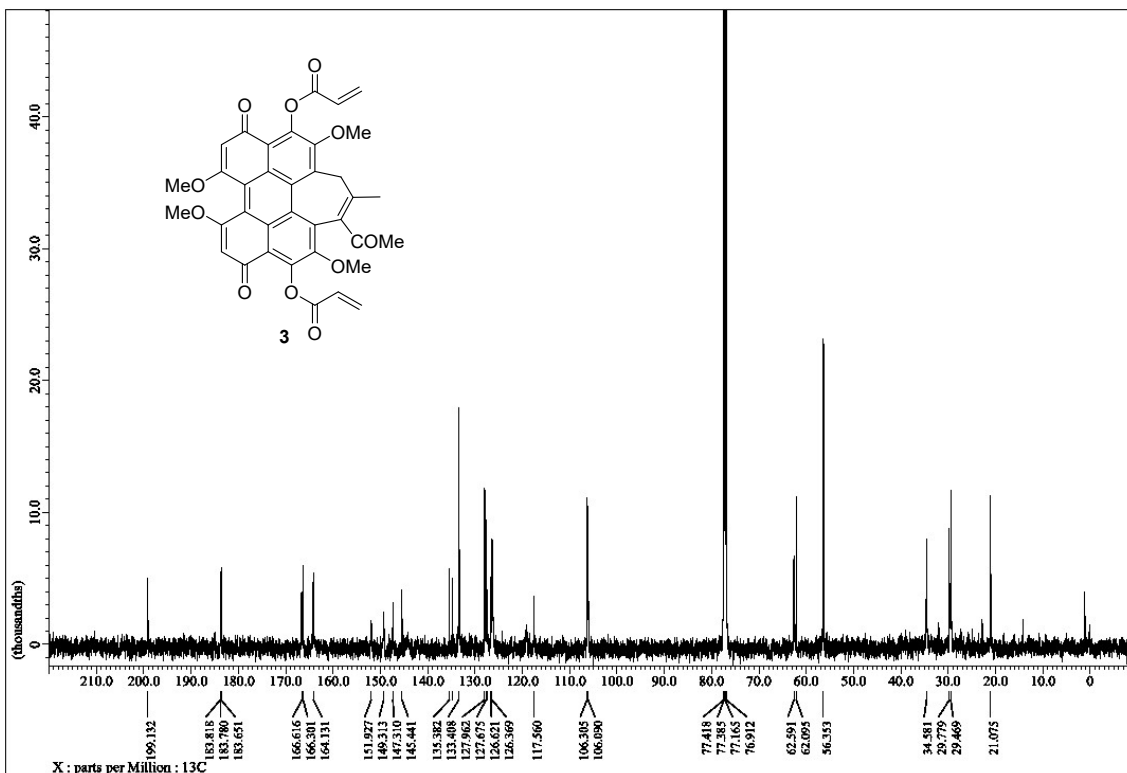

Fig. S2 <sup>13</sup>C NMR spectrum of 3

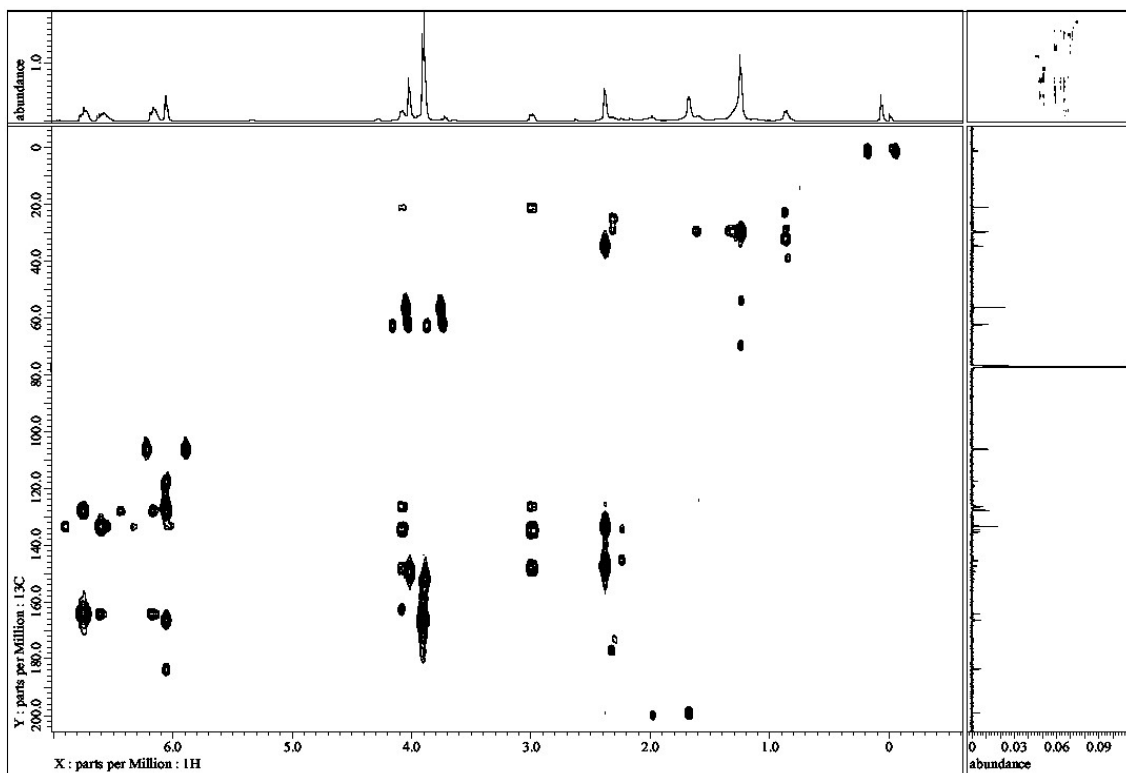

Fig. S3 HMBC spectrum of 3

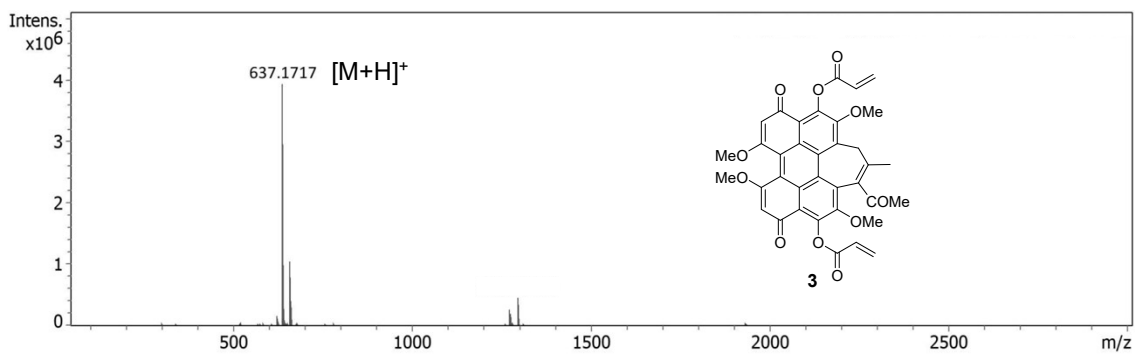

Fig. S4 HRMS spectrum of 3
